# Supplementary material for: Spontaneous resolution upon crystallization of chiral La(iii) and Gd(iii) MOFs from achiral dihydroxymalonate
Source: Royal Society of Chemistry journal article supplement (doi:10.1039/c0cc01804j), 2010-01-01
Supplement: c0cc01804j.pdf [file c0cc01804j.pdf]

## Spontaneous resolution upon crystallization of chiral La(III) and Gd(III) MOFs from achiral dihydroxymalonate

Beatriz Gil-Hernández,<sup>a</sup> Henning A. Höppe,<sup>b</sup> Jana K. Vieth,<sup>b</sup> Joaquin Sanchiz<sup>a,\*</sup> and Christoph Janiak<sup>b,\*</sup>

<sup>a</sup> Departamento de Química Inorgánica, Universidad de La Laguna, La Laguna 38206, Spain. Fax: 34 922318461; Tel: 34 922316502 ext 5425; E-mail: jsanchiz@ull.es

<sup>b</sup> Institut für Anorganische und Analytische Chemie, Universität Freiburg, Albertstr. 21, 79104 Freiburg, Germany; Tel: int+49 761 2036127; E-mail: janiak@uni-freiburg.de

### Syntheses of the complexes:

An aqueous solution of 2-dihydroxymalonic acid (0.3 mmol in 3 mL) is placed in a sample tube and an aqueous solution of the Lanthanoid (La, Gd) nitrate hexahydrate (0.2 mmol in 3 mL) is added with a Pasteur pipette from the bottom of the tube without mixing both solutions. A small amount of precipitate is formed immediately which is allowed to stand. X-ray suitable single crystals are obtained within five days (Fig. S1). As the starting material is achiral the reaction yields equivalent quantities of both crystal enantiomorphs (opposite handedness).

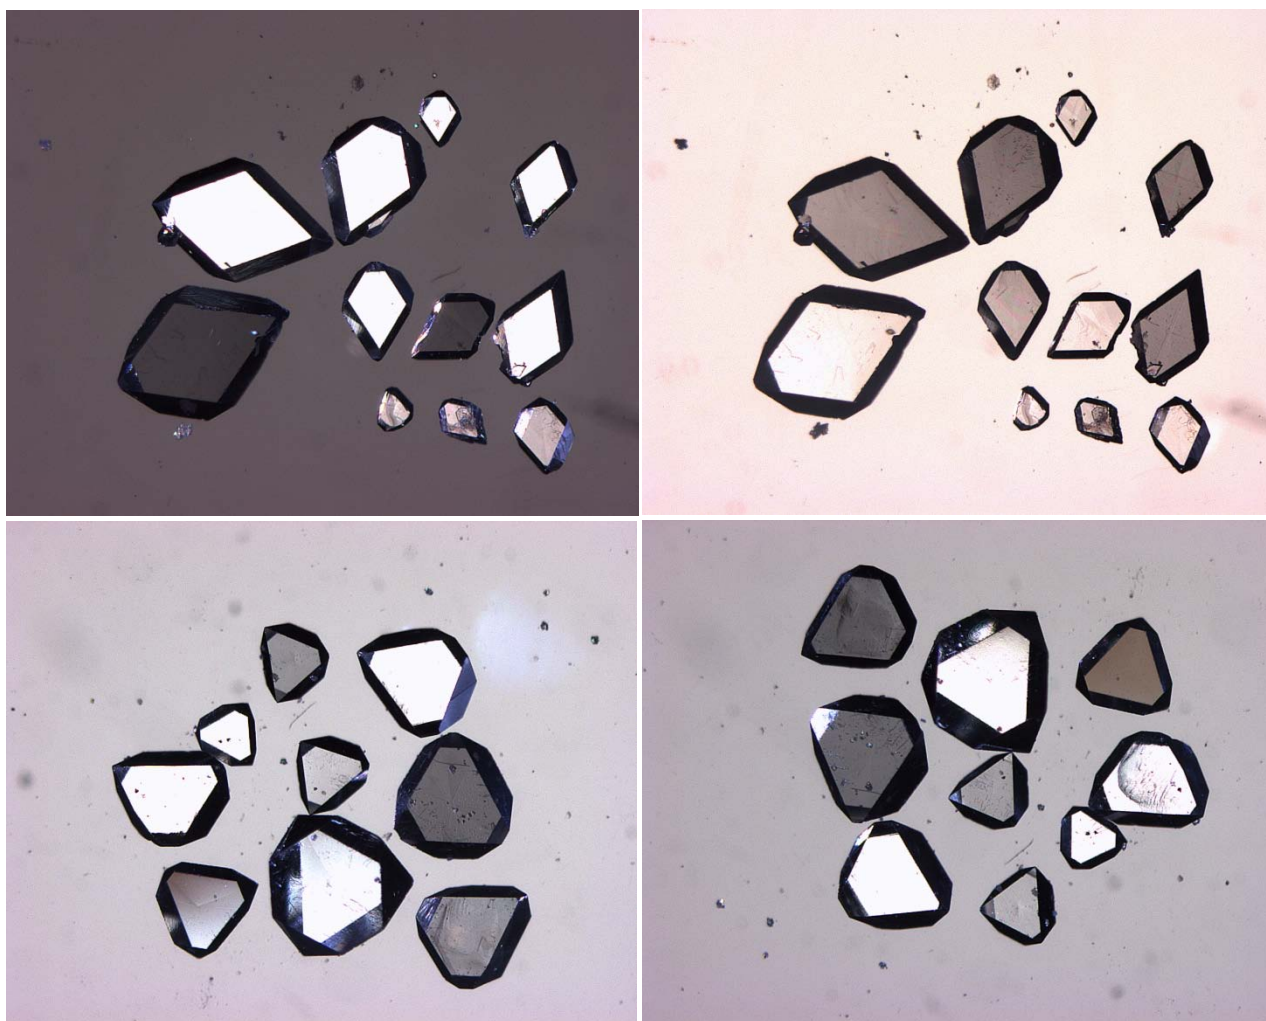

**Fig. S1a** Crystal photographs from the batch of  $[\text{La}_2(\mu\text{-mesoxalato})_3(\text{H}_2\text{O})_6]$  (**1**).

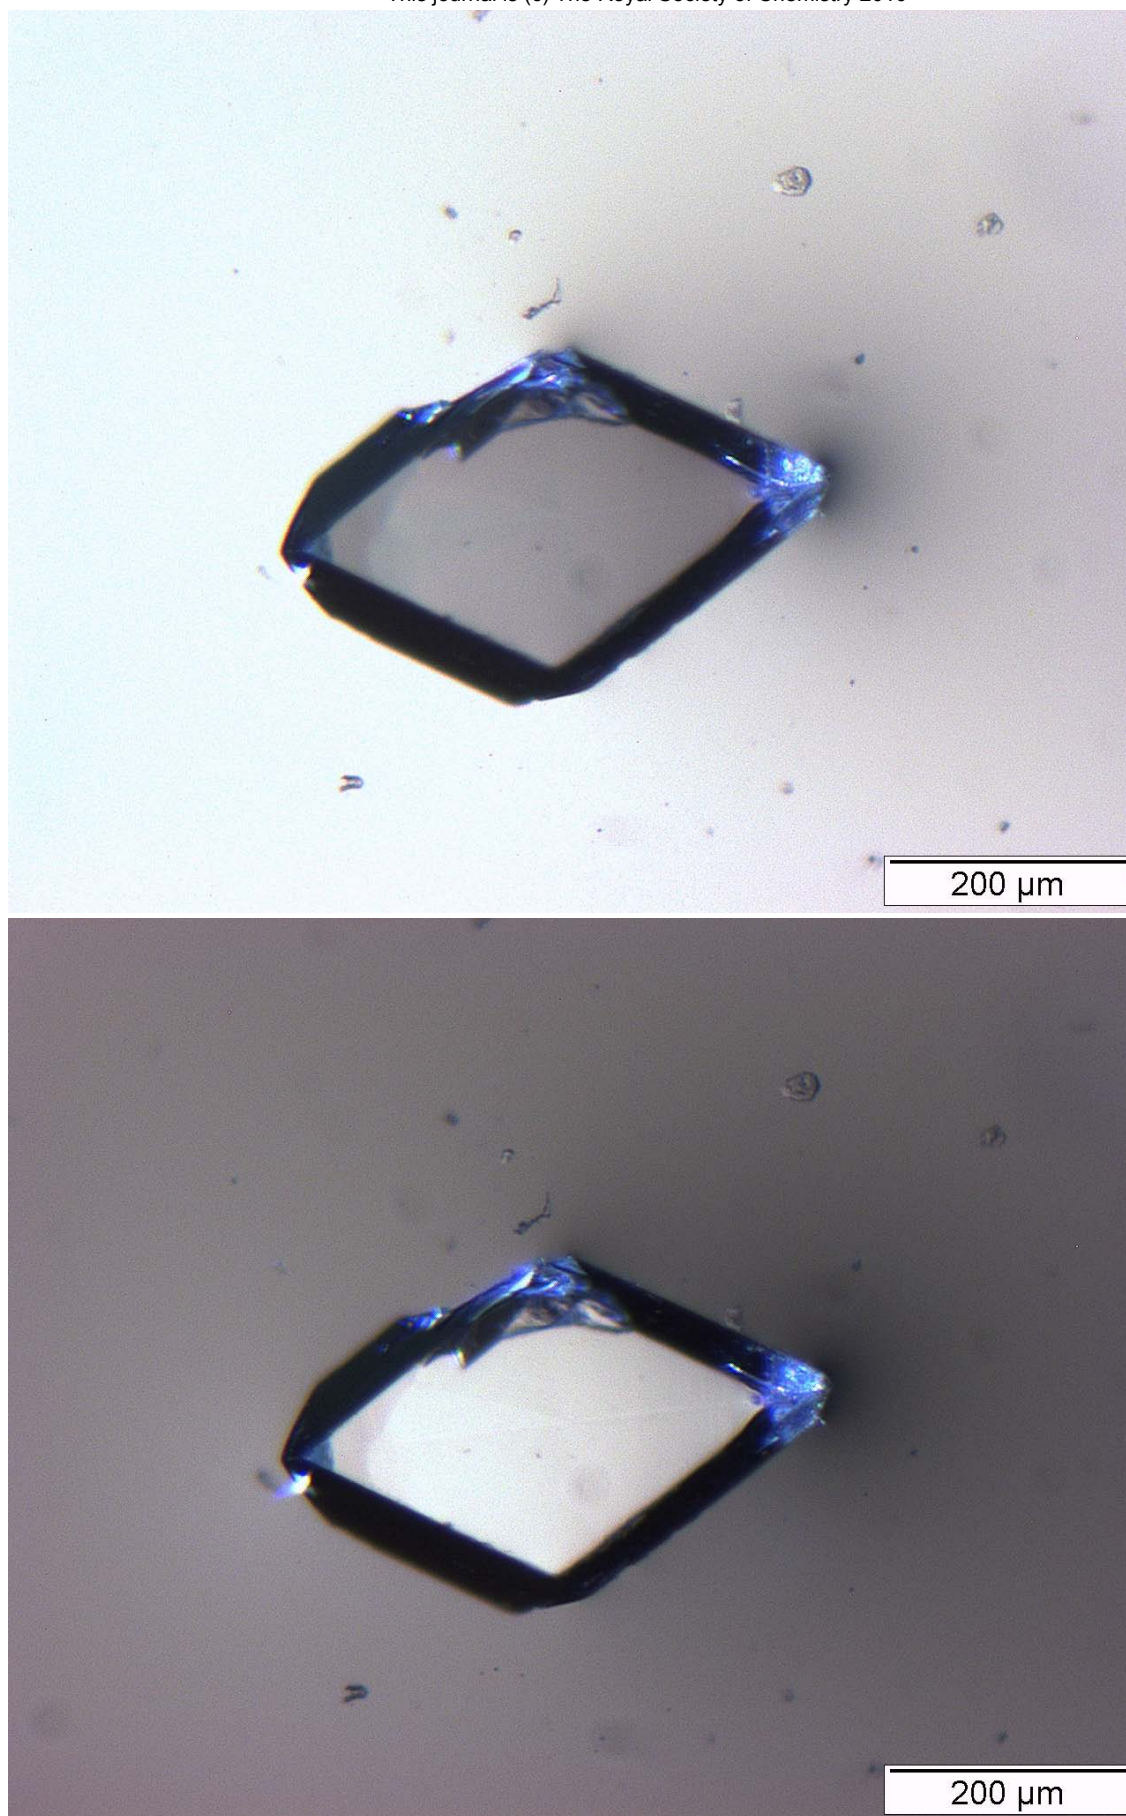

**Fig. S1b** Crystal photograph for the crystal of  $\Delta$ -1 (ketb).

### Details of crystal structure solution and refinement:

The crystal structure of the first data set (which was the one of **1** in the  $\Delta$  configuration) could not be solved directly in the final space group  $R32$  (no. 155) but in the monoclinic one  $P1$ . After obtaining a basic structure model, this was transformed to  $R32$ .

A suitable single crystal was carefully selected under a polarizing microscope.

*Data Collection:* Rigaku R-axis Spider image plate detector diffractometer, Mo- $K\alpha$  radiation ( $\lambda = 0.71073 \text{ \AA}$ ), graphite monochromator, double-pass method  $\omega$ -scan. Data collection, cell refinement and data reduction with CrystalClear,<sup>1</sup> empirical (multi-scan) absorption correction with ABSCOR.<sup>2</sup> *Structure Analysis and Refinement:* The structure was solved by direct methods (SHELXS-97);<sup>3</sup> refinement was done by full-matrix least squares on  $F^2$  using the SHELXL-97 program suite. All non-hydrogen positions were refined with anisotropic temperature factors. Hydrogen atoms of the aqua ligands and on the hydroxyl groups of the mesoxalato ligand were found and refined with  $U_{\text{iso}}(\text{H}) = 1.5U_{\text{eq}}(\text{O})$ .

Graphics were drawn with DIAMOND (Version 3.2c).<sup>4</sup> Network analysis was carried out using the program package TOPOS.<sup>5</sup>

**Crystal data and details on the structure refinement are given in Table S1.**

---

1 CrystalClearSM 1.4.0, Rigaku Corporation, Tokyo, Japan. 2007.

2 T. Higashi, ABSCOR. Rigaku Corporation, Tokyo, Japan. 1995.

3 G. M. Sheldrick, *Acta Cryst.*, 2008, **A64**, 112–122.

4 K. Brandenburg, *Diamond* (Version 3.2c), Crystal and Molecular Structure Visualization, Crystal Impact – K. Brandenburg & H. Putz Gbr, Bonn (Germany) 2009; <http://www.crystalimpact.com/diamond>.

5 TOPOS program package for multipurpose crystallochemical analysis, version 4.0, <http://www.topos.ssu.samara.ru>; V. A. Blatov, *IUCr Compcomm. Newsletter* 2006, 7, 4; <http://www.iucr.org/iucr-top/comm/ccom/newsletters>

**Table S1** Crystal data and structure refinement for [La<sub>2</sub>(μ-mesoxalato)<sub>3</sub>(H<sub>2</sub>O)<sub>6</sub>] (**1**) and [Gd<sub>2</sub>(μ-mesoxalato)<sub>3</sub>(H<sub>2</sub>O)<sub>6</sub>] (**2**)

| Compound (identifier)                                                                    | <b>1</b> (2laketo_c)                                           | <b>1</b> (ketb)                                                | <b>2</b> (gdketo)                                              |
|------------------------------------------------------------------------------------------|----------------------------------------------------------------|----------------------------------------------------------------|----------------------------------------------------------------|
| Empirical formula                                                                        | C <sub>9</sub> H <sub>18</sub> La <sub>2</sub> O <sub>24</sub> | C <sub>9</sub> H <sub>18</sub> La <sub>2</sub> O <sub>24</sub> | C <sub>9</sub> H <sub>18</sub> Gd <sub>2</sub> O <sub>24</sub> |
| <i>M</i> /g mol <sup>-1</sup>                                                            | 788.05                                                         | 788.05                                                         | 824.73                                                         |
| Crystal size/mm                                                                          | 0.38 x 0.29 x 0.28                                             | 0.62 x 0.47 x 0.28                                             | 0.19 x 0.10 x 0.08                                             |
| Crystal appearance                                                                       | prism, colorless                                               | prism, colorless                                               | block, colorless                                               |
| Temperature/K                                                                            | 123(2)                                                         | 203(2)                                                         | 294(2)                                                         |
| 2θ range/° (completeness)                                                                | 8.36 – 79.98 (98.8%)                                           | 6.16 – 79.96 (99.8%)                                           | 6.26 – 66.28 (99.8%)                                           |
| <i>h</i> ; <i>k</i> ; <i>l</i> range                                                     | ±17; ±17; -35, 37                                              | ±17; ±17; -38, 32                                              | ±14; -13, 12; -31, 29                                          |
| Crystal system                                                                           | trigonal                                                       | trigonal                                                       | trigonal                                                       |
| Space group                                                                              | <i>R</i> 32 (no. 155)                                          | <i>R</i> 32 (no. 155)                                          | <i>R</i> 32 (no. 155)                                          |
| <i>a</i> /Å                                                                              | 9.75040(10)                                                    | 9.7580(3)                                                      | 9.6396(8)                                                      |
| <i>b</i> /Å                                                                              | 9.75040(10)                                                    | 9.7580(3)                                                      | 9.6396(8)                                                      |
| <i>c</i> /Å                                                                              | 21.2854(15)                                                    | 21.2982(15)                                                    | 20.7433(16)                                                    |
| <i>α</i> [deg]                                                                           | 90                                                             | 90                                                             | 90                                                             |
| <i>β</i> [deg]                                                                           | 90                                                             | 90                                                             | 90                                                             |
| <i>γ</i> [deg]                                                                           | 120                                                            | 120                                                            | 120                                                            |
| <i>V</i> /Å <sup>3</sup>                                                                 | 1752.50(13)                                                    | 1756.29(15)                                                    | 1669.3(2)                                                      |
| <i>Z</i>                                                                                 | 3                                                              | 3                                                              | 3                                                              |
| <i>D</i> <sub>calc</sub> /g cm <sup>-3</sup>                                             | 2.240                                                          | 2.235                                                          | 2.461                                                          |
| <i>F</i> (000)                                                                           | 1134                                                           | 1134                                                           | 1176                                                           |
| <i>μ</i> /mm <sup>-1</sup>                                                               | 3.714                                                          | 3.706                                                          | 6.020                                                          |
| Max/min transmission                                                                     | 0.4228/0.3327                                                  | 0.4235/0.2072                                                  | 0.6445/0.3942                                                  |
| Reflections collected                                                                    | 46805                                                          | 20627                                                          | 10186                                                          |
| Indep. reflections ( <i>R</i> <sub>int</sub> )                                           | 2409 (0.0145)                                                  | 2432 (0.0338)                                                  | 1427 (0.0345)                                                  |
| Obs. reflect [ <i>I</i> > 2σ( <i>I</i> )]                                                | 2401                                                           | 2295                                                           | 1391                                                           |
| Parameters refined                                                                       | 63                                                             | 63                                                             | 63                                                             |
| Max./min. Δρ <sup>a</sup> /e Å <sup>-3</sup>                                             | 1.263/-1.246                                                   | 0.964/-1.058                                                   | 0.977/-1.088                                                   |
| <i>R</i> <sub>T</sub> / <i>wR</i> <sub>2</sub> [ <i>I</i> > 2σ( <i>I</i> )] <sup>b</sup> | 0.0125/0.0296                                                  | 0.0178/0.0378                                                  | 0.0182/0.0408                                                  |
| <i>R</i> <sub>T</sub> / <i>wR</i> <sub>2</sub> (all reflect.) <sup>b</sup>               | 0.0126/0.0297                                                  | 0.0200/0.0381                                                  | 0.0190/0.0411                                                  |
| Goodness-of-fit on <i>F</i> <sup>2c</sup>                                                | 1.189                                                          | 1.101                                                          | 1.209                                                          |
| Weight. scheme <i>w</i> ; <i>a</i> / <i>b</i> <sup>d</sup>                               | 0.0099/3.5048                                                  | 0.0171/0.6499                                                  | 0.0102/1.7470                                                  |
| Flack parameter <sup>e</sup>                                                             | -0.004(11)                                                     | -0.002(13)                                                     | -0.026(16)                                                     |

<sup>a</sup> Largest difference peak and hole. – <sup>b</sup>  $R_1 = [\sum(|F_o| - |F_c|)] / \sum |F_o|$ ;  $wR_2 = [\sum [w(F_o^2 - F_c^2)^2] / \sum [w(F_o^2)^2]]^{1/2}$ . – <sup>c</sup> Goodness-of-fit =  $[\sum [w(F_o^2 - F_c^2)^2] / (n - p)]^{1/2}$ . – <sup>d</sup>  $w = 1 / [\sigma^2(F_o^2) + (aP)^2 + bP]$  where  $P = (\max(F_o^2 \text{ or } 0) + 2F_c^2) / 3$ . – <sup>e</sup> Absolute structure parameter.<sup>6</sup>

6 (a) H. D. Flack and G. Bernardinelli, *Chirality*, 2008, **20**, 681-690. (b) H. D. Flack and G. Bernardinelli, *Acta Crystallogr. A*, 1999, **55**, 908-915. (c) H. D. Flack, *Acta Crystallogr. A*, 1983, **39**, 876-881.

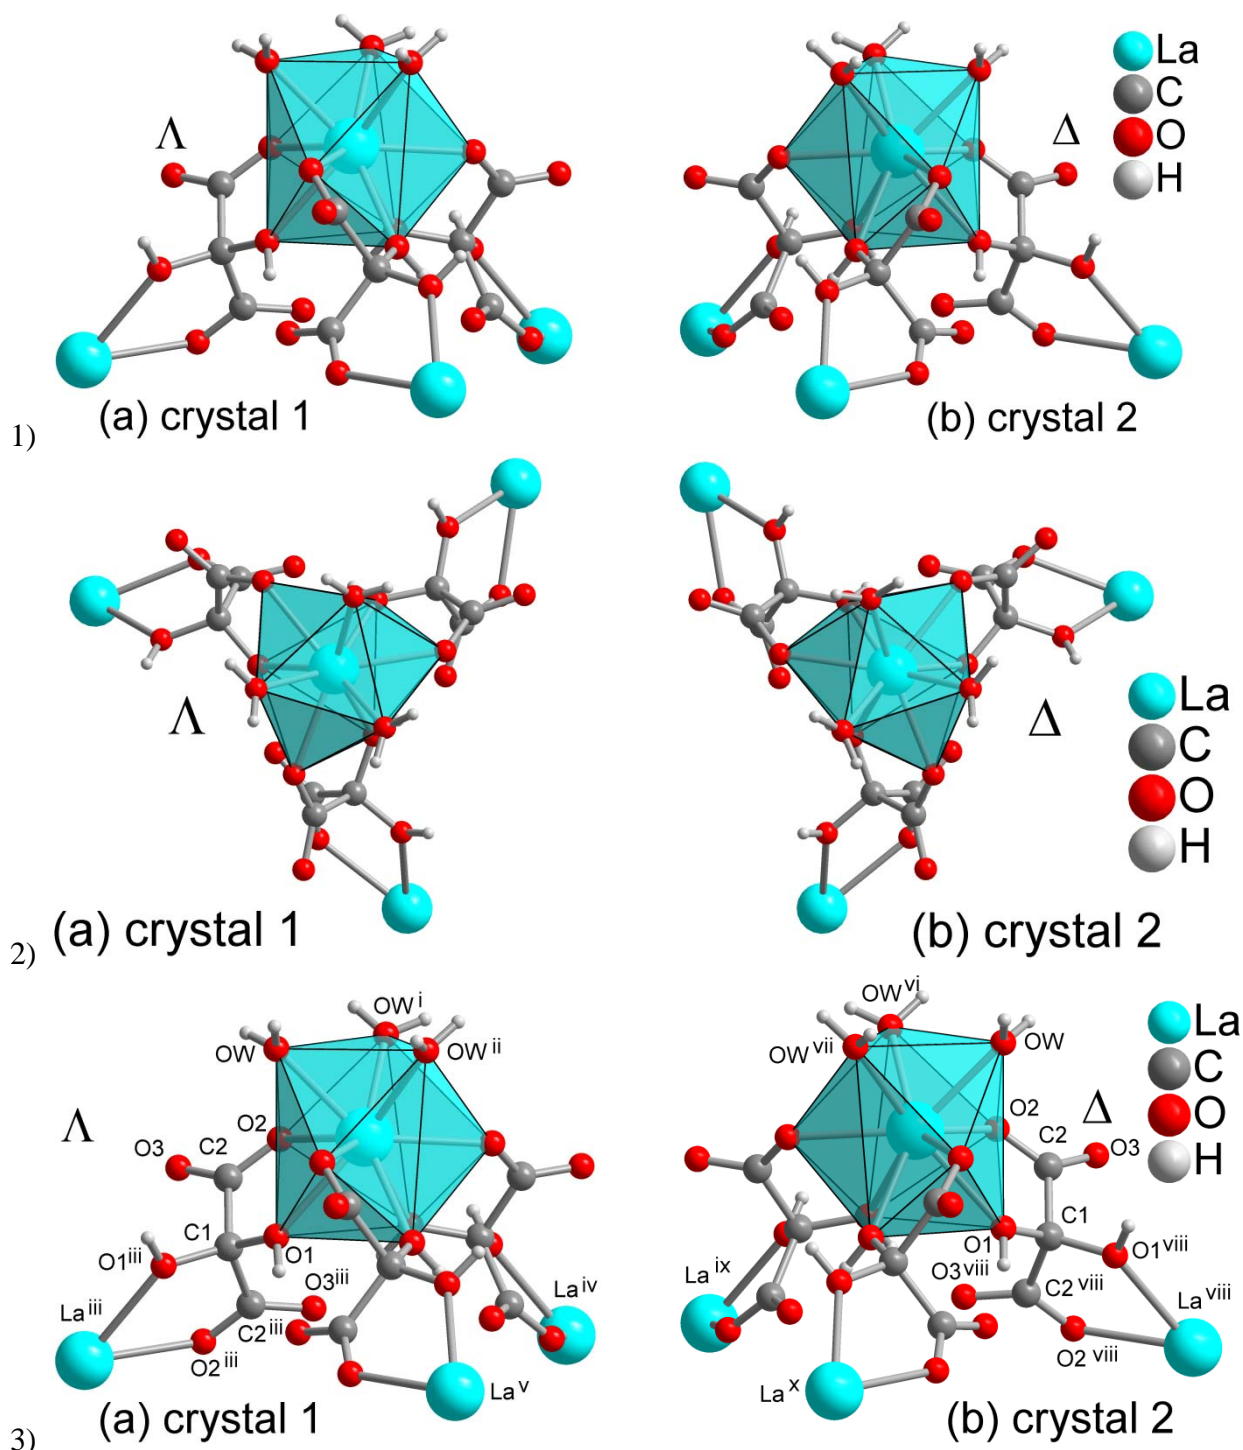

**Fig. S2** La coordination sphere in (a)  $\Lambda$ -1 and (b)  $\Delta$ -1 in a polyhedral presentation to illustrate the tri-capped trigonal prism, also showing the bridging action of the mesoxalato ligand to the next La atoms.

- 1) - ball-and-stick representation, side view,  
 2) - ball-and-stick representation, top view  
 3) - ball-and-stick representation with atom labels.

Symmetry transformations in (a)  $\Lambda$ -1: i =  $1-x+y, 2-x, z$ ; ii =  $2-y, 1+x-y, z$ ; iii =  $2/3+x-y, 1+1/3-y, 1+1/3-z$ ; iv =  $2/3+x-y, 2+1/3-y, 1+1/3-z$ ; v =  $1+2/3+x-y, 2+1/3-y, 1+1/3-z$ .

Symmetry transformations in (b)  $\Delta$ -1: vi =  $-x+y, -x, z$ ; vii =  $-y, x-y, z$ ; viii =  $1/3+x-y, 2/3-y, 2/3-z$ ; ix =  $1/3+x-y, -1/3-y, 2/3-z$ ; x =  $-2/3+x-y, -1/3-y, 2/3-z$ .

**Table S2** Bonds lengths (Å) and angles (°) in **1** and **2**.

|                            | $\Delta$ - <b>1</b> (Ln = La) | $\Delta$ - <b>1</b> (Ln = La) | <b>2</b> (Ln = Gd) |
|----------------------------|-------------------------------|-------------------------------|--------------------|
| Ln–O1                      | 2.5738(8)                     | 2.5737(10)                    | 2.4727(19)         |
| Ln–O2                      | 2.5175(10)                    | 2.5189(12)                    | 2.422(2)           |
| Ln–OW                      | 2.4994(11)                    | 2.5003(13)                    | 2.391(2)           |
| C1–O1                      | 1.3972(12)                    | 1.3972(14)                    | 1.395(3)           |
| C1–C2                      | 1.5616(14)                    | 1.5639(18)                    | 1.564(3)           |
| C2–O2                      | 1.2582(14)                    | 1.2574(18)                    | 1.254(3)           |
| C2–O3                      | 1.2475(14)                    | 1.2425(18)                    | 1.240(3)           |
| OW–Ln–OW <sup>i/vi</sup>   | 73.66(5)                      | 73.83(7)                      | 75.21(11)          |
| OW–Ln–O2 <sup>i/vi</sup>   | 138.52(4)                     | 138.65(5)                     | 137.36(9)          |
| OW–Ln–O2 <sup>ii/vii</sup> | 70.98(3)                      | 71.17(4)                      | 69.59(8)           |
| OW–Ln–O2                   | 76.17(4)                      | 75.85(5)                      | 73.20(9)           |
| O2–Ln–O2 <sup>i/vi</sup>   | 119.285(7)                    | 119.287(8)                    | 119.789(9)         |
| OW–Ln–O1 <sup>i/vi</sup>   | 149.28(4)                     | 149.03(5)                     | 146.78(8)          |
| O2–Ln–O1 <sup>i/vi</sup>   | 73.16(3)                      | 73.23(4)                      | 73.60(7)           |
| OW–Ln–O1 <sup>ii/vii</sup> | 131.12(3)                     | 131.24(4)                     | 131.87(7)          |
| O2–Ln–O1 <sup>ii/vii</sup> | 126.81(3)                     | 126.84(4)                     | 130.32(7)          |
| OW–Ln–O1                   | 94.58(4)                      | 94.40(5)                      | 92.21(9)           |
| O2–Ln–O1                   | 60.15(3)                      | 60.08(3)                      | 62.31(6)           |
| O1–Ln–O1 <sup>i/vi</sup>   | 71.57(3)                      | 71.62(4)                      | 73.29(8)           |

Symmetry transformations in  $\Delta$ -**1** and **2**: i = 1–x+y, 2–x, z; ii = 2–y, 1+x–y, z.  
 Symmetry transformations in  $\Delta$ -**1**: vi = –x+y, –x, z; vii = –y, x–y, z.

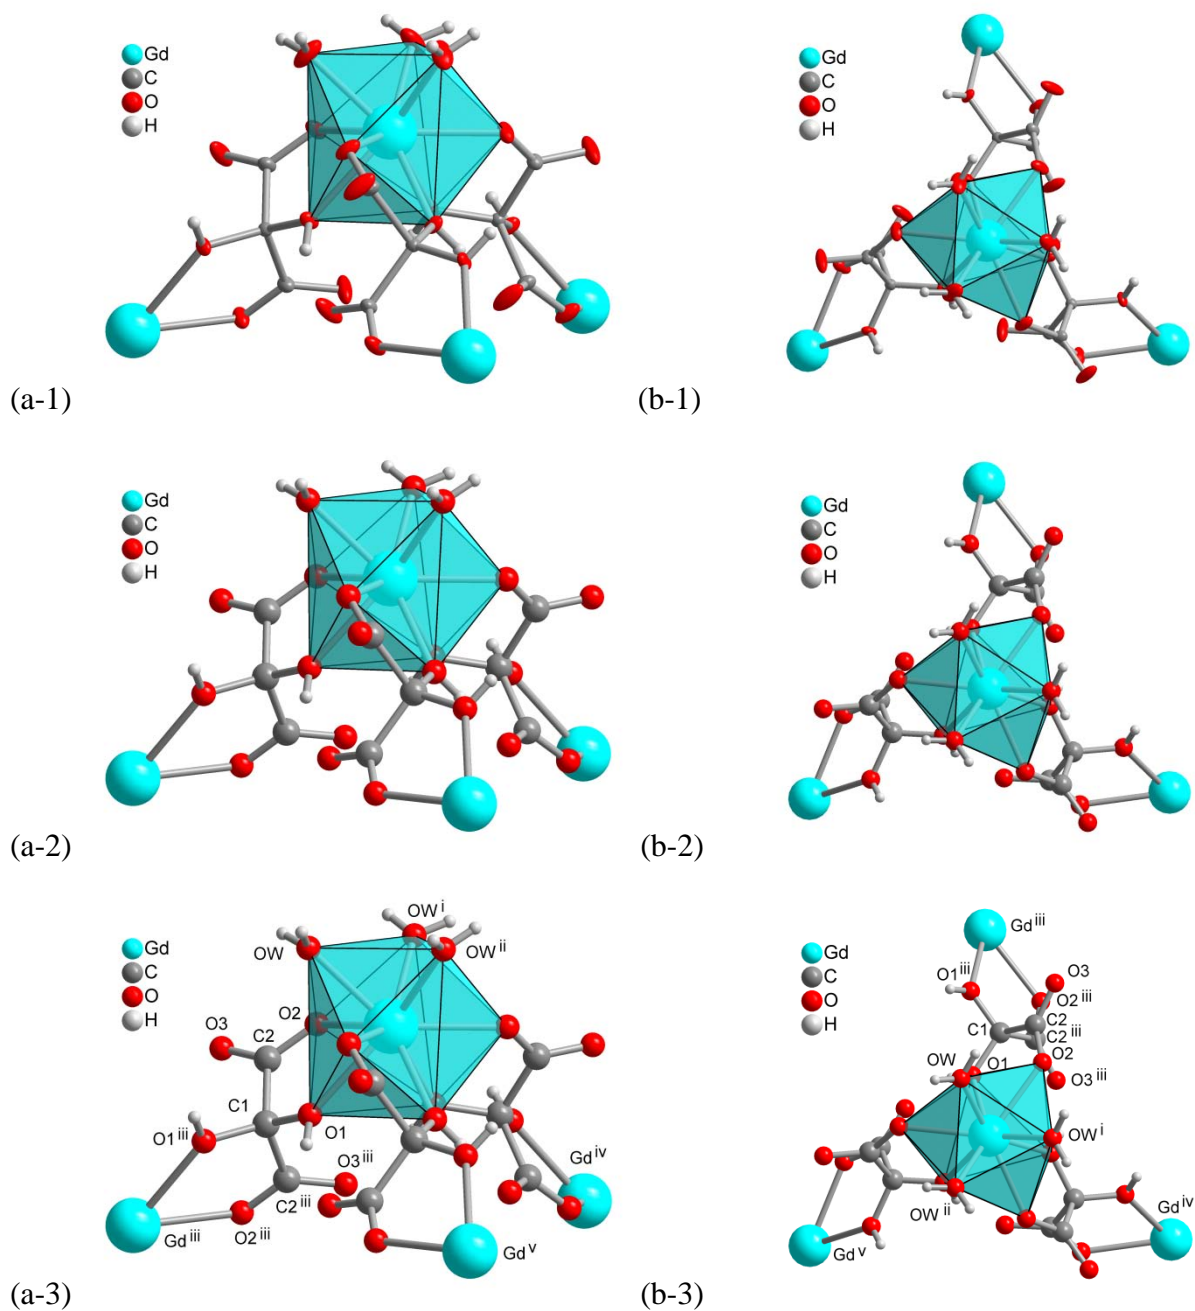

**Fig. S3** Gd coordination sphere in **2** ( $\Lambda$ -configuration) in a polyhedral presentation to illustrate the tri-capped trigonal prism, (a) side view, (b) top view; also showing the bridging action of the mesoxalato ligand to the next Gd atoms.

1) - thermal ellipsoids (50% probability) for C and O,

2) - ball-and-stick representation,

3) - ball-and-stick representation with atom labels; symmetry transformations: i = 1-x+y, 2-x, z; ii = 2-y, 1+x-y, z; iii = 2/3+x-y, 1+1/3-y, 1+1/3-z; iv = 2/3+x-y, 2+1/3-y, 1+1/3-z; v = 1+2/3+x-y, 2+1/3-y, 1+1/3-z.

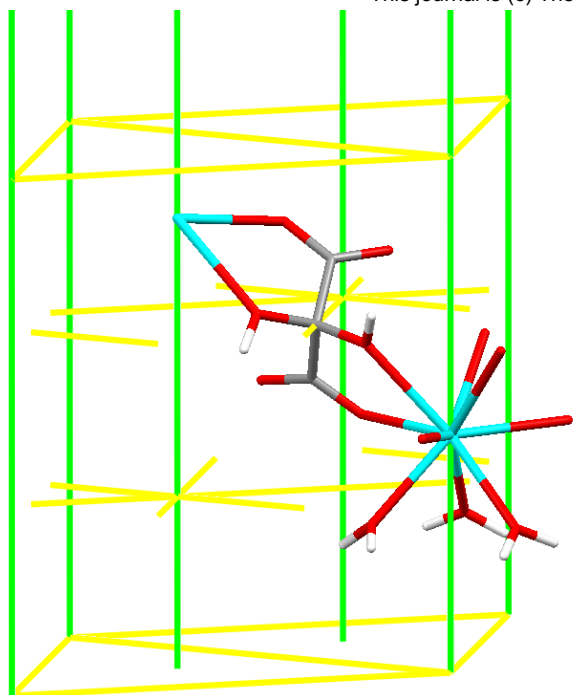

**Fig. S4** The proper rotation axes (yellow 2-fold, green 3-fold) in space group *R* 32 with a unit of **1** or **2** (not shown are the 2-fold and 3-fold screw axes).

**Table S3** Hydrogen bonding interactions in **1** and **2**.<sup>a</sup>

| D-H...A                        | D-H<br>[Å] | H...A<br>[Å] | D...A<br>[Å] | D-H...A<br>[°] |
|--------------------------------|------------|--------------|--------------|----------------|
| <b><math>\Lambda</math>-1:</b> |            |              |              |                |
| intra-layer:                   |            |              |              |                |
| O1-H1-O3 <sup>xi</sup>         | 0.860(15)  | 1.755(16)    | 2.6038(13)   | 169(2)         |
| inter-layer:                   |            |              |              |                |
| OW-HW2-O3 <sup>xii</sup>       | 0.825(16)  | 1.974(18)    | 2.7153(15)   | 149(2)         |
| OW-HW1-O2 <sup>xiii</sup>      | 0.871(15)  | 2.073(17)    | 2.9095(17)   | 161(2)         |
| <b><math>\Delta</math>-1:</b>  |            |              |              |                |
| intra-layer:                   |            |              |              |                |
| O1-H1-O3 <sup>xiv</sup>        | 0.838(16)  | 1.804(17)    | 2.6083(16)   | 160(2)         |
| inter-layer:                   |            |              |              |                |
| OW-HW2-O3 <sup>xv</sup>        | 0.851(15)  | 1.916(17)    | 2.7158(18)   | 156(2)         |
| OW-HW1-O2 <sup>xvi</sup>       | 0.900(16)  | 2.066(18)    | 2.926(2)     | 160(2)         |
| <b><math>\Lambda</math>-2:</b> |            |              |              |                |
| intra-layer:                   |            |              |              |                |
| O1-H1-O3 <sup>xi</sup>         | 0.78(3)    | 1.85(3)      | 2.592(3)     | 159(4)         |
| inter-layer:                   |            |              |              |                |
| OW-HW2-O3 <sup>xii</sup>       | 0.79(2)    | 1.98(3)      | 2.700(3)     | 150(4)         |
| OW-HW1-O2 <sup>xiii</sup>      | 0.80(2)    | 2.19(3)      | 2.969(3)     | 165(3)         |

<sup>a</sup> D = Donor, A = acceptor. For found and refined atoms the standard deviations are given.

Symmetry relations:

xi =  $y+2/3, x+1/3, -z+4/3$ ; xii =  $-x+4/3, -x+y+2/3, -z+5/3$ ; xiii =  $x-y+4/3, -y+5/3, -z+5/3$ ;

xiv =  $y-2/3, x-1/3, -z+2/3$ ; xv =  $-x+2/3, -x+y+1/3, -z+1/3$ ; xvi =  $x-y-1/3, -y+1/3, -z+1/3$ .



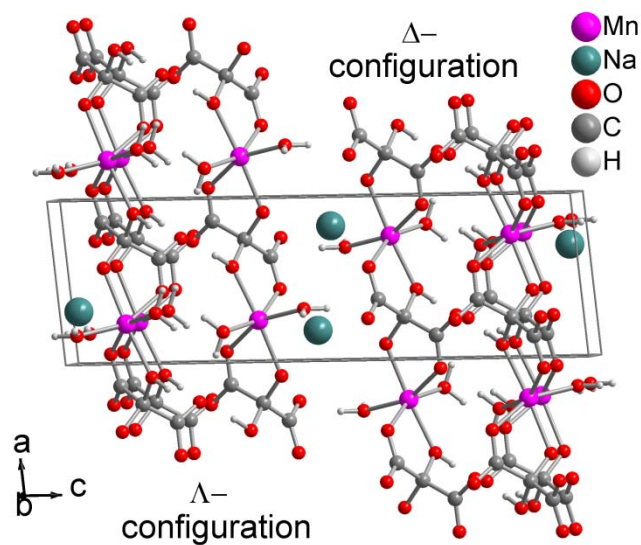

**Fig. S5** Packing diagram of  $\{Na[Mn(mesox)(H_2O)_2]\}_n$  (Refcode: AZESON).<sup>1</sup> The bis-chelated Mn atoms in a supramolecular 2D layer parallel to the  $ab$  plane all have the indicated  $\Lambda^-$  or  $\Delta^-$  configuration.

<sup>1</sup> J.-M. Shi, S.-C. Zhu and W.-D. Liu, *Trans. Met. Chem.* 2004, **29**, 358-360; catena-(sodium ( $\mu$ -hydroxy(oxy)malonato)-diaqua-manganese(II)).

### Details of magnetic measurements:

Magnetic susceptibility measurements on polycrystalline samples were carried out in the temperature range 1.9-300 K by means of a Quantum Design SQUID magnetometer operating at 500 Oe ( $T < 15$  K) and 5000 Oe ( $T > 15$  K). Diamagnetic corrections of the constituent atoms were estimated from Pascal's constants<sup>1</sup> and experimental susceptibilities were also corrected for the magnetization of the sample holder. The magnetic susceptibility data have been analyzed by means of the expression for a two-dimensional Heisenberg classical honeycomb lattice.<sup>2,3</sup> The best fit parameter are  $g = 2.01(1)$ ,  $J = -0.0039(1)$  cm<sup>-1</sup> and  $R = 3.6 \times 10^{-6}$ .  $R$  is the agreement factor defined as  $\sum_i [(\chi T)_{\text{obs}}(i) - (\chi T)_{\text{calc}}(i)]^2 / \sum_i [(\chi T)_{\text{obs}}(i)]^2$ . Almost an identical result [ $g = 1.98(1)$ ,  $J = -0.0040(1)$  cm<sup>-1</sup> and  $R = 3.63 \times 10^{-6}$ ] is obtained analyzing the magnetic susceptibility data by means of the high-temperature series expansion derived from the two-dimensional Heisenberg model for a  $S = 7/2$  honey comb lattice.<sup>4</sup>  $N$  the Avogadro's number  $6.0221367 \times 10^{23}$  mol<sup>-1</sup>,  $g$  the Landé factor,  $\beta$  the Bohr magneton  $4.66864374 \times 10^{-5}$  cm<sup>-1</sup> G<sup>-1</sup>,  $k$  the Boltzmann's constant  $0.69503877$  K<sup>-1</sup> cm<sup>-1</sup>

$$\chi = [Ng^2\beta^2 / (3kT)] \cdot X \cdot \left( 1 + \sum_{n=1}^8 A_n(X) K^n \right)$$

with

$$A_n(X) = \sum_{i=1}^n a_n X^i$$

$$X = S(S+1)$$

and

$$K = J/kT$$

$A_n$  and  $a_n$  are the coefficients for the honey comb lattice and  $J$  is the intra-layer magnetic coupling between the local spins of the nearest-neighbours. The  $a_n$  coefficients are taken from ref 4, p 179

$$H = -\sum_i J (S_i \cdot S_{i+1})$$

- 1 R. L. Carlin, *Magnetochemistry*; Springer-Verlag: Berlin, Heidelberg, 1986.
- 2 J. Curely, F. Lloret and M. Julve, *Phys. Rev. B*, 1998, **58**, 11465
- 3 L. Cañadillas-Delgado, J. Pasan, O. Fabelo, M. Hernández-Molina, F. Lloret, M. Julve and C. Ruiz-Pérez, *Inorg. Chem.*, 2006, **45**, 10585.
- 4 R. Navarro, *Application of High- and Low-Temperature Series Expansions to Two-dimensional Magnetic Systems*, ed. L. J. de Jongh, Kluwer Academic Publishers, The Netherlands, 1990.
- 5 O. Kahn, *Molecular Magnetism*, VCH, New York, 1993
